# Supplementary material for: Correlation of Plasmatic Amyloid Beta Peptides (Aβ40, Aβ-42) with Myocardial Injury and Inflammatory Biomarkers in Acute Coronary Syndrome
Source: Preprints.org preprint supplement (doi:10.20944/preprints202401.1243.v1), 2024-01-16
Supplement: Supplementary file 1 [file supplementary]

**Table S1.** (Additional analysis was calculated without outliers†). Shows the correlation between our study variables and Aβ peptides (Aβ-42, Aβ-40), Aβ-42/40 ratio in 57 patients with acute coronary syndrome. Data was analyzed using Spearman’s correlation test (Additional analysis was calculated without outliers).

| **Variable** | **Aβ-42 (pg/ml)** | | **Aβ-40 (pg/ml)** | | **Aβ-42/40 ratio** | |
| --- | --- | --- | --- | --- | --- | --- |
| Rho | p value | Rho | p value | Rho | p value |
| Age (years) | 0.191 | 0.155 | 0.392 | 0.003 | -0.316 | 0.016 |
| BMI (Kg/m2) | 0.034 | 0.803 | -0.031 | 0.820 | -0.008 | 0.951 |
| One or more SMuRF | 0.156 | 0.246 | 0.231 | 0.084 | -0.215 | 0.108 |
| High sensitivity troponin I (pg/ml) | -0.003 | 0.981 | 0.084 | 0.536 | -0.091 | 0.500 |
| CRP (mg/dl) | -0.006 | 0.965 | 0.028 | 0.848 | -0.069 | 0.636 |
| NT-proBNP | 0.289 | 0.029 | 0.290 | 0.029 | -0.177 | 0.187 |
| Albumin (g/dl) | -0.160 | 0.311 | -0.045 | 0.775 | 0.105 | 0.508 |
| Total cholesterol (mg/dl) | -0.078 | 0.607 | 0.131 | 0.386 | -0.092 | 0.542 |
| HDL (mg/dl) | -0.075 | 0.613 | 0.101 | 0.492 | -0.086 | 0.559 |
| LDL (mg/dl) | -0.080 | 0.589 | 0.092 | 0.536 | -0.051 | 0.732 |
| Triglycerides | 0.132 | 0.394 | 0.092 | 0.552 | -0.028 | 0.855 |
| AIP | 0.138 | 0.372 | 0.049 | 0.751 | 0.003 | 0.982 |
| Symptom-to-blood sample‡ | -0.050 | 0.713 | -0.167 | 0.214 | 0.070 | 0.606 |

**†** Outliers defined by **Aβ-42** <20 pg/ml or >100 pg/ml, **Aβ-40** >400 pg/ml, **Aβ-42/40 ratio** <1.0 and **NT-proBNP** >10,000 pg/ml. ‡Time between symptom onset and blood sample collection.

**
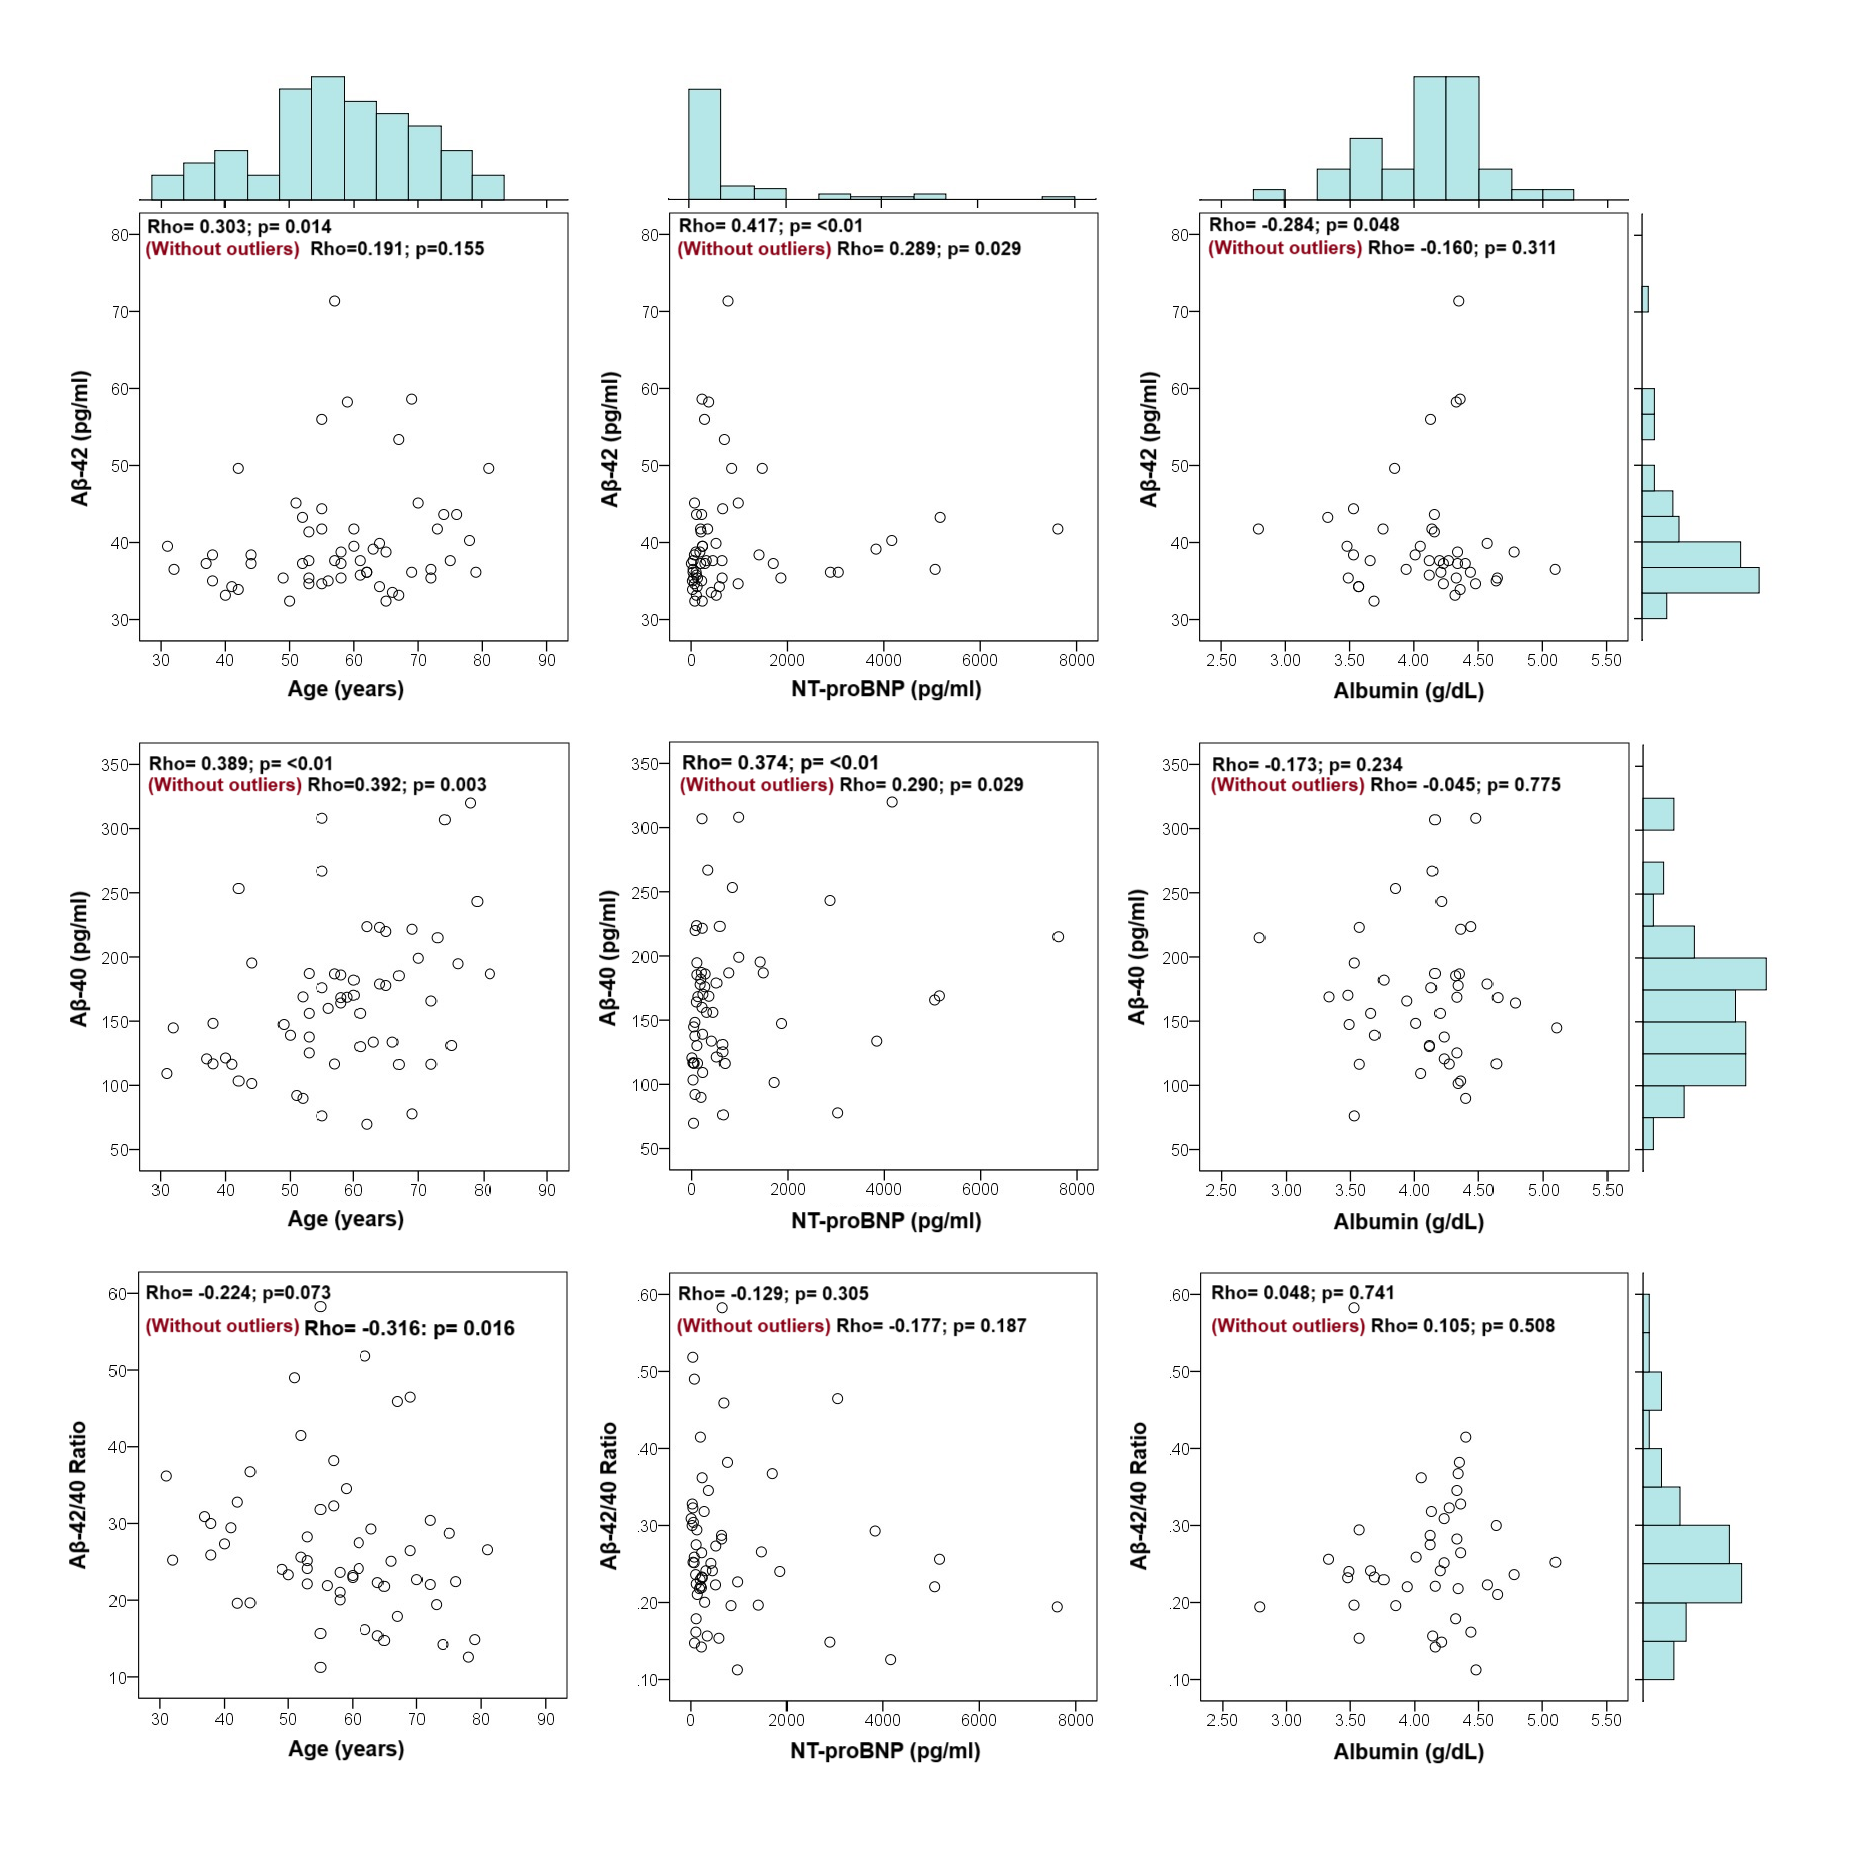
**

**Figure S1.** Correlation analysis without outliers. Scatterplot matrix and marginal histograms (with Spearman’s correlation coefficients) showing the relation between **Aβ-42** vs age, NT-proBNP, and albumin (*top row*); **Aβ-40** vs age, NT-proBNP, and albumin (*middle row*); **Aβ-42/40 Ratio** vs age, NT-proBNP, and albumin (*bottom row*).

**Table S2.** (Additional analysis without outliers † was calculated). Demographic characteristics of 57 patients admitted to the coronary care unit grouped by ST elevation myocardial infarction (STEMI) or non-ST elevation myocardial infarction (NSTEMI). Data is shown as mean ± standard deviation, median (percentile 25 – percentile 75), and absolute value (percentage)

| **Variable** | **STEMI**  **(N = 30)** | **NSTEMI**  **(N = 27)** | **p value** |
| --- | --- | --- | --- |
| Age (years) | 57 ± 13 | 58 ± 12 | 0.747 |
| Sex  Male  Female | 27 (87.1%)  4 (12.9%) | 20 (74.1%)  7 (25.9%) | 0.177 |
| BMI (Kg/m2)  Overweight  Obesity  Overweight/Obesity | 28.35 ± 4.2  13 (41.9%)  11 (35.5%)  24 (77.4%) | 28.12 ± 3.78  12 (44.4%)  9 (33.3%)  21 (77.7%) | 0.826 |
| Diabetes | 3 (9.7%) | 7 (25.9%) | 0.099 |
| Hypertension | 15 (48.4%) | 20 (74.1%) | 0.046 |
| Dyslipidemia | 6 (19.4%) | 6 (22.2%) | 0.788 |
| Previous myocardial infarction | 7 (22.6%) | 15 (55.6%) | 0.010 |
| Smoking status  Current smoker  Former smoker  Nonsmoker | 15 (48.4%)  5 (16.1%)  11 (35.5%) | 5 (18.5%)  15 (55.6%)  7 (25.9%) | 0.005 |
| Number of SMuRFs  One or more  None | 25 (83.3%)  5 (16.7%) | 26 (96.3%)  1 (3.7%) | 0.122 |
| NYHA  ≥2 Class | 4 (12.9%) | 2 (7.4%) | 0.404 |
| Killip-Kimball  ≥2 Class | 8 (25.8%) | 3 (11.1%) | 0.138 |
| GRACE  Intermediate-High Risk | 19 (61.3%) | 15 (55.5%) | 0.658 |
| TIMI  Intermediate-High Risk | 18 (58.1%) | 18 (66.7%) | 0.501 |
| CRUSADE  Moderate-High Risk | 11 (35.5%) | 11 (40.7%) | 0.681 |
| LVEF  Mid-range ejection fraction  Reduced ejection fraction | 11 (36.7%)  7 (23.3%) | 7 (28.0%)  5 (20.0%) | 0.373 |
| Symptom-to-door time (minutes) | 383 ± 193 | 284 ± 171 | 0.045 |
| Symptom-to-blood sample time‡ (minutes) | 409 ± 197 | 366 ± 182 | 0.391 |
| Door-to-ECG time (minutes) | 6 (5-8) | 5 (5-7) | 0.113 |
| Door-to-balloon time (minutes) | 508 (95-2394) | 2193 (1179-4154) | 0.003 |
| Symptom-to-catheter time (minutes) | 1763 ± 1973 | 3180 ± 2612 | 0.049 |

**†** Outliers defined by **Aβ-42** <20 pg/ml or >100 pg/ml, **Aβ-40** >400 pg/ml, **Aβ-42/40 ratio** <1.0 and **NT-proBNP** >10,000 pg/ml. ‡Time between symptom onset and blood sample collection

**Table S3.** Biochemical values from 65 patients admitted to the coronary care unit grouped by ST elevation myocardial infarction (STEMI) or non-ST elevation myocardial infarction (NSTEMI). Data is shown as mean ± standard deviation or median (percentile 25 – percentile 75)

| **Variable** | **STEMI**  **(N = 30)** | **NSTEMI**  **(N = 27)** | **p value** |
| --- | --- | --- | --- |
| Aβ-42 (pg/ml) | 35.96 (34.27-39.64) | 41.76 (38.99-47.75) | 0.001 |
| Aβ-40 (pg/ml) | 169.38 ± 88.26 | 183.68 ± 68.96 | 0.472 |
| Aβ-42/40 ratio | 0.25 (0.21-0.30) | 0.24 (0.20-0.38) | 0.708 |

**Table S4.** (Additional analysis without outliers **†**) Biochemical values from 57 patients admitted to the coronary care unit grouped by ST elevation myocardial infarction (STEMI) or non-ST elevation myocardial infarction (NSTEMI). Data is shown as mean ± standard deviation or median (percentile 25 – percentile 75)

| **Variable** | **STEMI**  **(N = 30)** | **NSTEMI**  **(N = 27)** | **p value** |
| --- | --- | --- | --- |
| Aβ-42 (pg/ml) | 35.39 (34.27-37.64) | 40.26 (37.64-45.13) | 0.001 |
| Aβ-40 (pg/ml) | 159.62 ± 49.59 | 172.26 ± 63.56 | 0.399 |
| Aβ-42/40 ratio | 0.24 ± 0.07 | 0.28 ± 0.12 | 0.118 |
| High sensitivity troponin I (pg/ml) | 354.0 (67.10-4742.0) | 247.0 (65.3-1021.0) | 0.315 |
| NT-proBNP (pg/ml) | 231.0 (74.6-642.0) | 315.0 (194.0-978.0) | 0.161 |
| CRP (mg/dl) | 4.99 (2.65-9.41) | 3.84 (0.99-7.52) | 0.198 |
| Albumin (g/dl) | 4.14 ± 0.43 | 4.06 ± 0.46 | 0.540 |
| Total cholesterol (mg/dl) | 172.5 ± 40.9 | 163.6 ± 32.7 | 0.434 |
| Triglycerides (mg/dl) | 165.5 ± 65.4 | 162.9 ± 55.0 | 0.889 |
| HDL (mg/dl) | 38.5 ± 9.1 | 35.7 ± 8.0 | 0.273 |
| LDL (mg/dl) | 114.7 ± 39.2 | 102.1 ± 30.8 | 0.227 |
| AIP | 0.25 ± 0.22 | 0.29 ± 0.15 | 0.472 |

**†** Outliers defined by **Aβ-42** <20 pg/ml or >100 pg/ml, **Aβ-40** >400 pg/ml, **Aβ-42/40 ratio** <1.0 and **NT-proBNP** >10,000 pg/ml.
